# Supplementary material
Source: PubMed Central journal article supplement (PMC6731482)
Supplement: rsbl20190371supp1.pdf [file rsbl20190371supp1.pdf]

## **SUPPLEMENTAL INFORMATION**

### **Optimization of Circadian Responses with Shorter and Shorter Millisecond Flashes**

Sevag Kaladchibachi, David C. Negelspach, Jamie M. Zeitzer, and Fabian Fernandez

- Supplementary Table 1: Light Exposure Conditions
- Supplementary Table 2: Energy-Response Values
- Supplementary Figure 1: Calculating phase-shifts to blue LED flashes

Supplementary Table 1. Light Exposure Conditions

| Protocol ID | Luminance in cd/m <sup>2</sup> | Pulse Duration (ms) | Pulse Frequency (Hz) | Total No. Pulses Delivered | Total Exposure Time (s) | Darkness between Pulses (s) |
|-------------|--------------------------------|---------------------|----------------------|----------------------------|-------------------------|-----------------------------|
| Blue 1      | 200                            | 120                 | 1.00                 | 900                        | 108                     | 0.88                        |
| Blue 2      | 160                            | 120                 | 1.00                 | 900                        | 108                     | 0.88                        |
| Blue 3      | 160                            | 120                 | 0.25                 | 225                        | 27                      | 3.88                        |
| Blue 4      | 160                            | 120                 | 0.13                 | 117                        | 14                      | 7.58                        |
| Blue 5      | 90                             | 120                 | 1.00                 | 900                        | 108                     | 0.88                        |
| Blue 6      | 90                             | 120                 | 0.25                 | 225                        | 27                      | 3.88                        |
| Blue 7      | 90                             | 120                 | 0.13                 | 117                        | 14                      | 7.58                        |
| Blue 8      | 27                             | 120                 | 1.00                 | 900                        | 108                     | 0.88                        |
| Blue 9      | 27                             | 120                 | 0.25                 | 225                        | 27                      | 3.88                        |
| Blue 10     | 27                             | 120                 | 0.13                 | 117                        | 14                      | 7.58                        |
| Blue 11     | 27                             | 120                 | 0.06                 | 54                         | 6.5                     | 16.6                        |
| Blue 12     | 12                             | 120                 | 1.00                 | 900                        | 108                     | 0.88                        |
| Blue 13     | 12                             | 120                 | 0.25                 | 225                        | 27                      | 3.88                        |
| Blue 14     | 12                             | 120                 | 0.13                 | 117                        | 14                      | 7.58                        |
| Blue 15     | 12                             | 120                 | 0.06                 | 54                         | 6.5                     | 16.6                        |
| Blue 16     | 6                              | 120                 | 1.00                 | 900                        | 108                     | 0.88                        |
| Blue 17     | 6                              | 120                 | 0.25                 | 225                        | 27                      | 3.88                        |
| Blue 18     | 6                              | 120                 | 0.13                 | 117                        | 14                      | 7.58                        |
| Blue 19     | 6                              | 120                 | 0.06                 | 54                         | 6.5                     | 16.6                        |
| Blue 20     | 2                              | 120                 | 1.00                 | 900                        | 108                     | 0.88                        |
| Blue 21     | 2                              | 120                 | 0.25                 | 225                        | 27                      | 3.88                        |
| Blue 22     | 2                              | 120                 | 0.13                 | 117                        | 14                      | 7.58                        |
| Blue 23     | 950                            | 16                  | 1.00                 | 900                        | 14.4                    | 0.984                       |

| Protocol ID | Luminance in cd/m <sup>2</sup> | Pulse Duration (ms) | Pulse Frequency (Hz) | Total No. Pulses Delivered | Total Exposure Time (s) | Darkness between Pulses (s) |
|-------------|--------------------------------|---------------------|----------------------|----------------------------|-------------------------|-----------------------------|
| Blue 24     | 950                            | 16                  | 0.25                 | 225                        | 3.6                     | 3.984                       |
| Blue 25     | 950                            | 16                  | 0.13                 | 117                        | 1.87                    | 7.68                        |
| Blue 26     | 200                            | 16                  | 1.00                 | 900                        | 14.4                    | 0.984                       |
| Blue 27     | 200                            | 16                  | 0.25                 | 225                        | 3.6                     | 3.984                       |
| Blue 28     | 200                            | 16                  | 0.13                 | 117                        | 1.87                    | 7.68                        |
| Blue 29     | 200                            | 16                  | 0.06                 | 54                         | 0.864                   | 16.6                        |
| Blue 30     | 90                             | 16                  | 1.00                 | 900                        | 14.4                    | 0.984                       |
| Blue 31     | 90                             | 16                  | 0.25                 | 225                        | 3.6                     | 3.984                       |
| Blue 32     | 90                             | 16                  | 0.13                 | 117                        | 1.87                    | 7.68                        |
| Blue 33     | 90                             | 16                  | 0.06                 | 54                         | 0.864                   | 16.6                        |
| Blue 34     | 45                             | 16                  | 1.00                 | 900                        | 14.4                    | 0.984                       |
| Blue 35     | 45                             | 16                  | 0.25                 | 225                        | 3.6                     | 3.984                       |
| Blue 36     | 45                             | 16                  | 0.13                 | 117                        | 1.87                    | 7.68                        |
| Blue 37     | 45                             | 16                  | 0.06                 | 54                         | 0.864                   | 16.6                        |
| Blue 38     | 2                              | 16                  | 1.00                 | 900                        | 14.4                    | 0.984                       |
| Blue 39     | 2                              | 16                  | 0.25                 | 225                        | 3.6                     | 3.984                       |
| Blue 40     | 2                              | 16                  | 0.13                 | 117                        | 1.87                    | 7.68                        |
| Blue 41     | 950                            | 8                   | 1.00                 | 900                        | 7.2                     | 0.992                       |
| Blue 42     | 950                            | 8                   | 0.25                 | 225                        | 1.8                     | 3.992                       |
| Blue 43     | 950                            | 8                   | 0.13                 | 117                        | 0.936                   | 7.68                        |
| Blue 44     | 950                            | 8                   | 0.06                 | 54                         | 0.432                   | 16.7                        |
| Blue 45     | 950                            | 8                   | 0.04                 | 36                         | 0.288                   | 24.992                      |
| Blue 46     | 950                            | 8                   | 0.03                 | 27                         | 0.216                   | 32.25                       |
| Blue 47     | 950                            | 8                   | 0.02                 | 15                         | 0.120                   | 58.82                       |
| Blue 48     | 400                            | 8                   | 1.00                 | 900                        | 7.2                     | 0.992                       |
| Blue 49     | 400                            | 8                   | 0.25                 | 225                        | 1.8                     | 3.992                       |

| Protocol ID | Luminance in cd/m <sup>2</sup> | Pulse Duration (ms) | Pulse Frequency (Hz) | Total No. Pulses Delivered | Total Exposure Time (s) | Darkness between Pulses (s) |
|-------------|--------------------------------|---------------------|----------------------|----------------------------|-------------------------|-----------------------------|
| Blue 50     | 400                            | 8                   | 0.13                 | 117                        | 0.936                   | 7.68                        |
| Blue 51     | 400                            | 8                   | 0.06                 | 54                         | 0.432                   | 16.7                        |
| Blue 52     | 400                            | 8                   | 0.04                 | 36                         | 0.288                   | 24.992                      |
| Blue 53     | 400                            | 8                   | 0.03                 | 27                         | 0.216                   | 32.25                       |
| Blue 54     | 180                            | 8                   | 1.00                 | 900                        | 7.2                     | 0.992                       |
| Blue 55     | 180                            | 8                   | 0.25                 | 225                        | 1.8                     | 3.992                       |
| Blue 56     | 180                            | 8                   | 0.13                 | 117                        | 0.936                   | 7.68                        |
| Blue 57     | 180                            | 8                   | 0.06                 | 54                         | 0.432                   | 16.7                        |
| Blue 58     | 90                             | 8                   | 1.00                 | 900                        | 7.2                     | 0.992                       |
| Blue 59     | 90                             | 8                   | 0.25                 | 225                        | 1.8                     | 3.992                       |
| Blue 60     | 90                             | 8                   | 0.13                 | 117                        | 0.936                   | 7.68                        |
| Blue 61     | 90                             | 8                   | 0.06                 | 54                         | 0.432                   | 16.7                        |
| Blue 62     | 2                              | 8                   | 1.00                 | 900                        | 7.2                     | 0.992                       |
| Blue 63     | 2                              | 8                   | 0.25                 | 225                        | 1.8                     | 3.992                       |
| Blue 64     | 2                              | 8                   | 0.13                 | 117                        | 0.936                   | 7.68                        |

Supplementary Table 2. Energy-Response Values

| <b>Wavelength Emission</b> |                                         | <b>Rate</b>                                    |                                          | <b>Total Light Energy</b>                   |                                  |                                               | <b>Behavior</b>      |
|----------------------------|-----------------------------------------|------------------------------------------------|------------------------------------------|---------------------------------------------|----------------------------------|-----------------------------------------------|----------------------|
| Protocol ID                | Irradiance in $\mu\text{W}/\text{cm}^2$ | Photon flux in photons/ $\text{cm}^2/\text{s}$ | Quanta density in photons/ $\text{cm}^2$ | Energy density in $\mu\text{J}/\text{cm}^2$ | Absolute energy in $\mu\text{J}$ | Magnitude of Delay in hours, SEM ( <i>n</i> ) |                      |
| Blue                       | 1                                       | 34.1                                           | $7.75 \times 10^{13}$                    | $8.36 \times 10^{15}$                       | 3683                             | 18046                                         | $1.25 \pm 0.17$ (28) |
| Blue                       | 2                                       | 27.22                                          | $6.18 \times 10^{13}$                    | $6.68 \times 10^{15}$                       | 2940                             | 14405                                         | $1.50 \pm 0.14$ (32) |
| Blue                       | 3                                       | 27.22                                          | $6.18 \times 10^{13}$                    | $1.67 \times 10^{15}$                       | 735                              | 3601                                          | $1.30 \pm 0.12$ (32) |
| Blue                       | 4                                       | 27.22                                          | $6.18 \times 10^{13}$                    | $8.38 \times 10^{14}$                       | 369                              | 1809                                          | $1.27 \pm 0.13$ (26) |
| Blue                       | 5                                       | 14.5                                           | $3.29 \times 10^{13}$                    | $3.56 \times 10^{15}$                       | 1566                             | 7673                                          | $1.56 \pm 0.18$ (27) |
| Blue                       | 6                                       | 14.5                                           | $3.29 \times 10^{13}$                    | $8.89 \times 10^{14}$                       | 392                              | 1918                                          | $1.34 \pm 0.10$ (26) |
| Blue                       | 7                                       | 14.5                                           | $3.29 \times 10^{13}$                    | $4.62 \times 10^{14}$                       | 204                              | 998                                           | $0.99 \pm 0.11$ (32) |
| Blue                       | 8                                       | 4.01                                           | $9.11 \times 10^{12}$                    | $9.84 \times 10^{14}$                       | 433                              | 2122                                          | $1.82 \pm 0.10$ (32) |
| Blue                       | 9                                       | 4.01                                           | $9.11 \times 10^{12}$                    | $2.46 \times 10^{14}$                       | 108                              | 531                                           | $1.72 \pm 0.11$ (32) |
| Blue                       | 10                                      | 4.01                                           | $9.11 \times 10^{12}$                    | $1.28 \times 10^{14}$                       | 56                               | 276                                           | $1.41 \pm 0.14$ (32) |
| Blue                       | 11                                      | 4.01                                           | $9.11 \times 10^{12}$                    | $5.90 \times 10^{13}$                       | 26                               | 127                                           | $1.67 \pm 0.11$ (32) |
| Blue                       | 12                                      | 2.3                                            | $5.22 \times 10^{12}$                    | $5.64 \times 10^{14}$                       | 248                              | 1217                                          | $1.58 \pm 0.14$ (23) |
| Blue                       | 13                                      | 2.3                                            | $5.22 \times 10^{12}$                    | $1.41 \times 10^{14}$                       | 62                               | 304                                           | $1.43 \pm 0.17$ (24) |
| Blue                       | 14                                      | 2.3                                            | $5.22 \times 10^{12}$                    | $7.33 \times 10^{13}$                       | 32                               | 158                                           | $1.13 \pm 0.16$ (32) |
| Blue                       | 15                                      | 2.3                                            | $5.22 \times 10^{12}$                    | $3.39 \times 10^{13}$                       | 15                               | 73                                            | $1.05 \pm 0.13$ (32) |
| Blue                       | 16                                      | 1.56                                           | $3.54 \times 10^{12}$                    | $3.83 \times 10^{14}$                       | 168                              | 826                                           | $1.50 \pm 0.13$ (31) |
| Blue                       | 17                                      | 1.56                                           | $3.54 \times 10^{12}$                    | $9.57 \times 10^{13}$                       | 42                               | 206                                           | $1.36 \pm 0.10$ (32) |
| Blue                       | 18                                      | 1.56                                           | $3.54 \times 10^{12}$                    | $4.97 \times 10^{13}$                       | 22                               | 107                                           | $1.03 \pm 0.11$ (32) |
| Blue                       | 19                                      | 1.56                                           | $3.54 \times 10^{12}$                    | $2.30 \times 10^{13}$                       | 10                               | 50                                            | $0.84 \pm 0.15$ (32) |
| Blue                       | 20                                      | 1.44                                           | $3.27 \times 10^{12}$                    | $3.53 \times 10^{14}$                       | 156                              | 762                                           | $0.81 \pm 0.15$ (38) |
| Blue                       | 21                                      | 1.44                                           | $3.27 \times 10^{12}$                    | $8.83 \times 10^{13}$                       | 39                               | 191                                           | $0.87 \pm 0.12$ (30) |
| Blue                       | 22                                      | 1.44                                           | $3.27 \times 10^{12}$                    | $4.59 \times 10^{13}$                       | 20                               | 99                                            | $0.29 \pm 0.13$ (32) |
| Blue                       | 23                                      | 16.4                                           | $3.73 \times 10^{13}$                    | $5.36 \times 10^{14}$                       | 236                              | 1157                                          | $1.81 \pm 0.09$ (96) |
| Blue                       | 24                                      | 16.4                                           | $3.73 \times 10^{13}$                    | $1.34 \times 10^{14}$                       | 59                               | 289                                           | $1.65 \pm 0.11$ (62) |

| <u>Wavelength Emission</u> |                                         | <u>Rate</u>                                    |                                          | <u>Total Light Energy</u>                   |                                  |                                          | <u>Behavior</u>      |
|----------------------------|-----------------------------------------|------------------------------------------------|------------------------------------------|---------------------------------------------|----------------------------------|------------------------------------------|----------------------|
| Protocol ID                | Irradiance in $\mu\text{W}/\text{cm}^2$ | Photon flux in photons/ $\text{cm}^2/\text{s}$ | Quanta density in photons/ $\text{cm}^2$ | Energy density in $\mu\text{J}/\text{cm}^2$ | Absolute energy in $\mu\text{J}$ | Magnitude of Delay in hours, SEM ( $n$ ) |                      |
| Blue                       | 25                                      | 16.4                                           | $3.73 \times 10^{13}$                    | $6.97 \times 10^{13}$                       | 31                               | 150                                      | $1.40 \pm 0.08$ (63) |
| Blue                       | 26                                      | 4.82                                           | $1.09 \times 10^{13}$                    | $1.58 \times 10^{14}$                       | 69                               | 340                                      | $1.52 \pm 0.10$ (63) |
| Blue                       | 27                                      | 4.82                                           | $1.09 \times 10^{13}$                    | $3.94 \times 10^{13}$                       | 17                               | 85                                       | $1.48 \pm 0.10$ (53) |
| Blue                       | 28                                      | 4.82                                           | $1.09 \times 10^{13}$                    | $2.05 \times 10^{13}$                       | 9.0                              | 44                                       | $1.44 \pm 0.12$ (51) |
| Blue                       | 29                                      | 4.82                                           | $1.09 \times 10^{13}$                    | $9.46 \times 10^{12}$                       | 4.2                              | 20                                       | $1.33 \pm 0.11$ (32) |
| Blue                       | 30                                      | 2.81                                           | $6.38 \times 10^{12}$                    | $9.19 \times 10^{13}$                       | 40                               | 198                                      | $1.84 \pm 0.15$ (30) |
| Blue                       | 31                                      | 2.81                                           | $6.38 \times 10^{12}$                    | $2.30 \times 10^{13}$                       | 10                               | 50                                       | $1.36 \pm 0.13$ (31) |
| Blue                       | 32                                      | 2.81                                           | $6.38 \times 10^{12}$                    | $1.19 \times 10^{13}$                       | 5.3                              | 26                                       | $0.98 \pm 0.12$ (32) |
| Blue                       | 33                                      | 2.81                                           | $6.38 \times 10^{12}$                    | $5.51 \times 10^{12}$                       | 2.4                              | 12                                       | $0.97 \pm 0.14$ (32) |
| Blue                       | 34                                      | 1.62                                           | $3.68 \times 10^{12}$                    | $5.30 \times 10^{13}$                       | 23                               | 114                                      | $1.58 \pm 0.12$ (31) |
| Blue                       | 35                                      | 1.62                                           | $3.68 \times 10^{12}$                    | $1.32 \times 10^{13}$                       | 5.8                              | 29                                       | $1.35 \pm 0.10$ (32) |
| Blue                       | 36                                      | 1.62                                           | $3.68 \times 10^{12}$                    | $6.89 \times 10^{12}$                       | 3.0                              | 15                                       | $1.57 \pm 0.13$ (32) |
| Blue                       | 37                                      | 1.62                                           | $3.68 \times 10^{12}$                    | $3.18 \times 10^{12}$                       | 1.4                              | 6.9                                      | $0.88 \pm 0.10$ (32) |
| Blue                       | 38                                      | 0.2                                            | $4.54 \times 10^{11}$                    | $6.54 \times 10^{12}$                       | 2.9                              | 14                                       | $0.89 \pm 0.17$ (22) |
| Blue                       | 39                                      | 0.2                                            | $4.54 \times 10^{11}$                    | $1.64 \times 10^{12}$                       | 0.7                              | 3.5                                      | $0.62 \pm 0.11$ (32) |
| Blue                       | 40                                      | 0.2                                            | $4.54 \times 10^{11}$                    | $8.50 \times 10^{11}$                       | 0.4                              | 1.8                                      | $0.23 \pm 0.12$ (32) |
| Blue                       | 41                                      | 8.64                                           | $1.96 \times 10^{13}$                    | $1.41 \times 10^{14}$                       | 62                               | 305                                      | $1.46 \pm 0.18$ (26) |
| Blue                       | 42                                      | 8.64                                           | $1.96 \times 10^{13}$                    | $3.53 \times 10^{13}$                       | 16                               | 76                                       | $1.62 \pm 0.17$ (32) |
| Blue                       | 43                                      | 8.64                                           | $1.96 \times 10^{13}$                    | $1.84 \times 10^{13}$                       | 8.1                              | 40                                       | $1.57 \pm 0.11$ (27) |
| Blue                       | 44                                      | 8.64                                           | $1.96 \times 10^{13}$                    | $8.48 \times 10^{12}$                       | 3.7                              | 18                                       | $1.68 \pm 0.13$ (32) |
| Blue                       | 45                                      | 8.64                                           | $1.96 \times 10^{13}$                    | $5.65 \times 10^{12}$                       | 2.5                              | 12                                       | $1.94 \pm 0.12$ (32) |
| Blue                       | 46                                      | 8.64                                           | $1.96 \times 10^{13}$                    | $4.24 \times 10^{12}$                       | 1.9                              | 9.1                                      | $1.62 \pm 0.10$ (32) |
| Blue                       | 47                                      | 8.64                                           | $1.96 \times 10^{13}$                    | $2.35 \times 10^{12}$                       | 1.0                              | 5.1                                      | $1.17 \pm 0.21$ (17) |
| Blue                       | 48                                      | 3.33                                           | $7.56 \times 10^{12}$                    | $5.45 \times 10^{13}$                       | 24                               | 117                                      | $1.92 \pm 0.13$ (32) |
| Blue                       | 49                                      | 3.33                                           | $7.56 \times 10^{12}$                    | $1.36 \times 10^{13}$                       | 6.0                              | 29                                       | $2.01 \pm 0.11$ (32) |

| <u>Wavelength Emission</u> |                                         | <u>Rate</u>                                    |                                          | <u>Total Light Energy</u>                   |                                  |                                          | <u>Behavior</u>      |
|----------------------------|-----------------------------------------|------------------------------------------------|------------------------------------------|---------------------------------------------|----------------------------------|------------------------------------------|----------------------|
| Protocol ID                | Irradiance in $\mu\text{W}/\text{cm}^2$ | Photon flux in photons/ $\text{cm}^2/\text{s}$ | Quanta density in photons/ $\text{cm}^2$ | Energy density in $\mu\text{J}/\text{cm}^2$ | Absolute energy in $\mu\text{J}$ | Magnitude of Delay in hours, SEM ( $n$ ) |                      |
| Blue                       | 50                                      | 3.33                                           | $7.56 \times 10^{12}$                    | $7.08 \times 10^{12}$                       | 3.1                              | 15                                       | $1.61 \pm 0.10$ (32) |
| Blue                       | 51                                      | 3.33                                           | $7.56 \times 10^{12}$                    | $3.27 \times 10^{12}$                       | 1.4                              | 7.0                                      | $1.37 \pm 0.08$ (32) |
| Blue                       | 52                                      | 3.33                                           | $7.56 \times 10^{12}$                    | $2.18 \times 10^{12}$                       | 1.0                              | 4.7                                      | $1.08 \pm 0.12$ (32) |
| Blue                       | 53                                      | 3.33                                           | $7.56 \times 10^{12}$                    | $1.63 \times 10^{12}$                       | 0.7                              | 3.5                                      | $1.03 \pm 0.12$ (32) |
| Blue                       | 54                                      | 2.96                                           | $6.72 \times 10^{12}$                    | $4.84 \times 10^{13}$                       | 21                               | 104                                      | $1.79 \pm 0.11$ (32) |
| Blue                       | 55                                      | 2.96                                           | $6.72 \times 10^{12}$                    | $1.21 \times 10^{13}$                       | 5.3                              | 26                                       | $1.28 \pm 0.12$ (32) |
| Blue                       | 56                                      | 2.96                                           | $6.72 \times 10^{12}$                    | $6.29 \times 10^{12}$                       | 2.8                              | 14                                       | $1.74 \pm 0.11$ (32) |
| Blue                       | 57                                      | 2.96                                           | $6.72 \times 10^{12}$                    | $2.90 \times 10^{12}$                       | 1.3                              | 6.3                                      | $0.92 \pm 0.12$ (32) |
| Blue                       | 58                                      | 1.33                                           | $3.02 \times 10^{12}$                    | $2.18 \times 10^{13}$                       | 9.6                              | 47                                       | $1.41 \pm 0.12$ (31) |
| Blue                       | 59                                      | 1.33                                           | $3.02 \times 10^{12}$                    | $5.44 \times 10^{12}$                       | 2.4                              | 12                                       | $1.05 \pm 0.11$ (32) |
| Blue                       | 60                                      | 1.33                                           | $3.02 \times 10^{12}$                    | $2.83 \times 10^{12}$                       | 1.2                              | 6.1                                      | $0.95 \pm 0.10$ (32) |
| Blue                       | 61                                      | 1.33                                           | $3.02 \times 10^{12}$                    | $1.31 \times 10^{12}$                       | 0.6                              | 2.8                                      | $0.87 \pm 0.10$ (32) |
| Blue                       | 62                                      | 0.1                                            | $2.27 \times 10^{11}$                    | $1.64 \times 10^{12}$                       | 0.7                              | 3.5                                      | $0.02 \pm 0.09$ (64) |
| Blue                       | 63                                      | 0.1                                            | $2.27 \times 10^{11}$                    | $4.09 \times 10^{11}$                       | 0.2                              | 0.9                                      | $0.37 \pm 0.14$ (32) |
| Blue                       | 64                                      | 0.1                                            | $2.27 \times 10^{11}$                    | $2.13 \times 10^{11}$                       | 0.1                              | 0.5                                      | $0.08 \pm 0.11$ (31) |

**Supplementary Figure 1.**

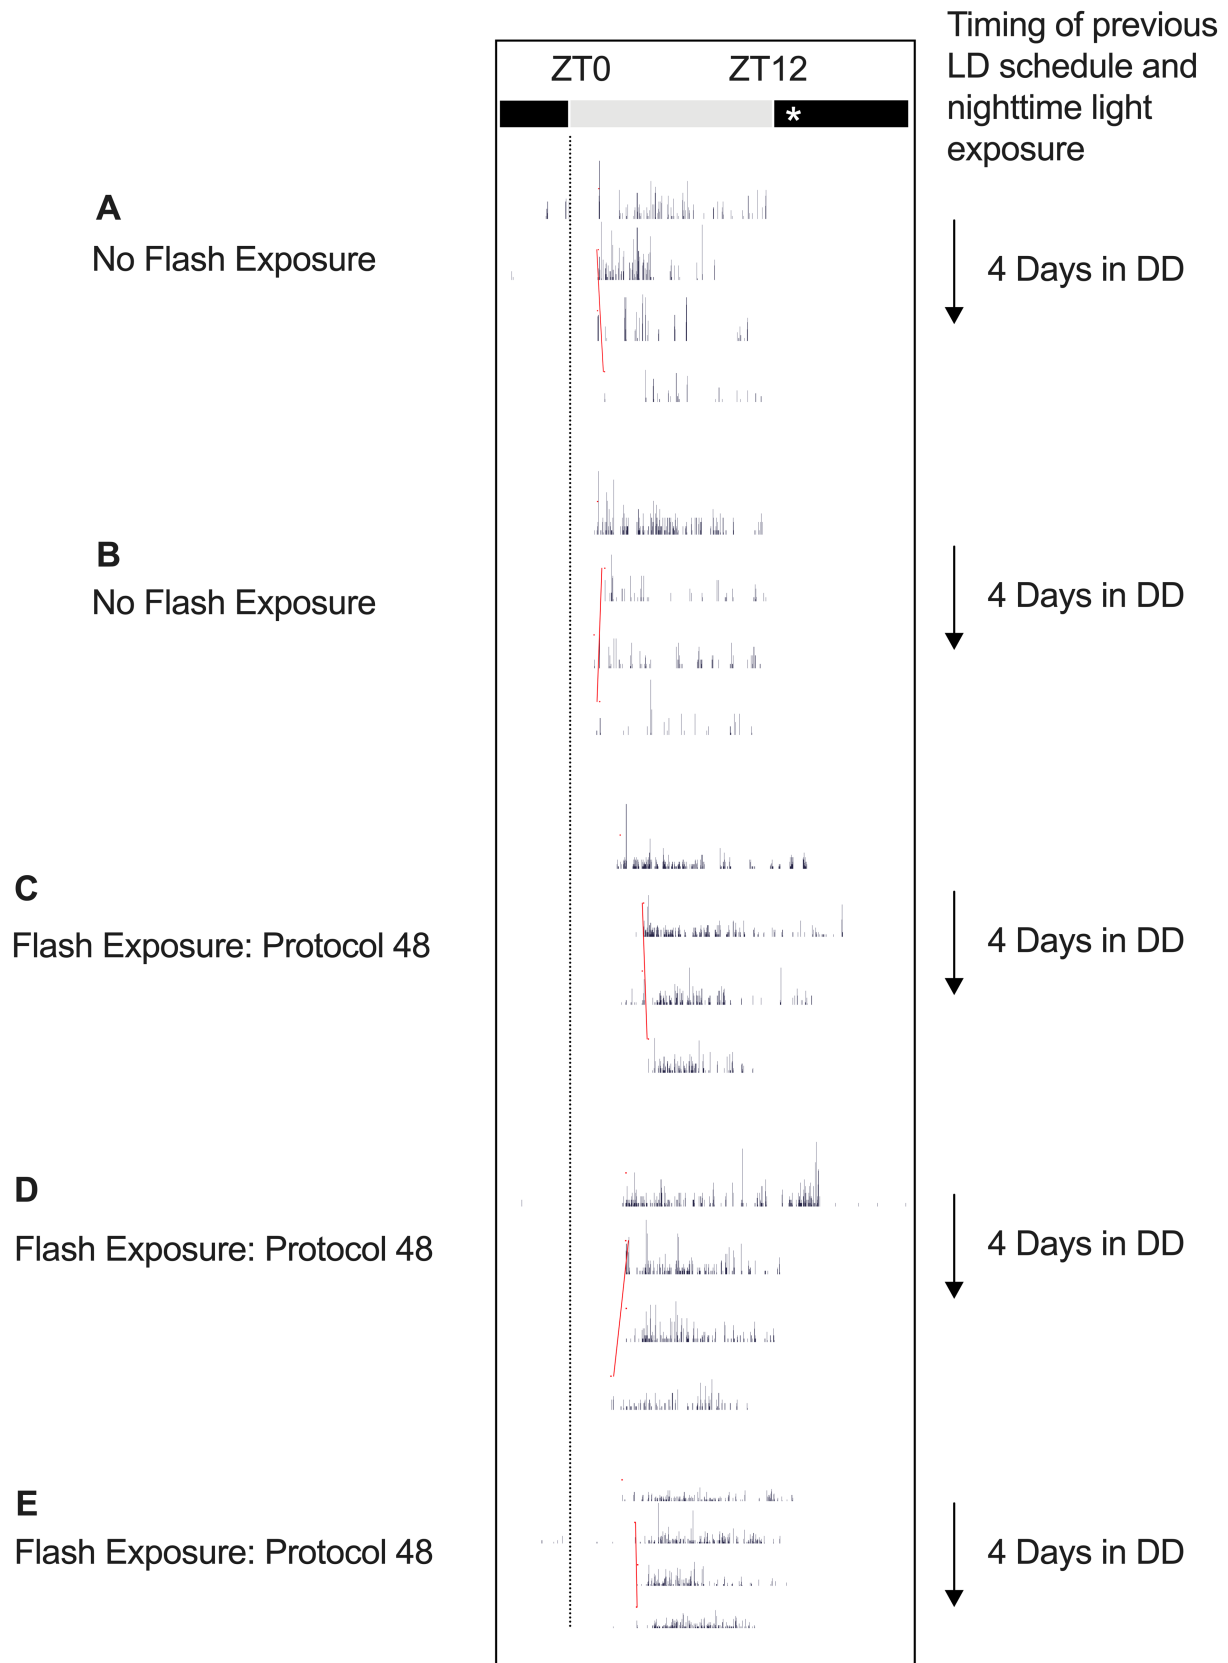



**Legend: Calculating phase-shifts to blue LED flashes.** Representative actograms taken from flies receiving no light (**A, B**) or a flash treatment employing 8-ms, 3.33  $\mu\text{W}/\text{cm}^2$  pulses delivered once per second for 15 min (**C-E**; protocol #48 in Supplementary Tables 1 and 2). Post treatment, from the last night of the light-dark (LD) cycle, animals were left to free-run in constant darkness (DD) for 4 days. Grey and black bars seated at the top of the figure show the timing of the previous LD schedule (ZT0, lights-on at 01.00; ZT12, lights-off at 13.00), while an asterisk marks the timing of light exposure (beginning at ZT13, 14.00). The 4 days proceeding from the last night of the LD cycle are depicted in each line of the example actograms. Within each actogram, dark blue bars indicate raw 30-s epochs where the animals registered breaks in the activity-tracking beams, smoothed over each minute of recording. Data are vertically aligned, such that one 24-h day of movement is shown per line, with successive days appearing one below the other. Red lines locate a regression fit for the daily activity onsets estimated by ClockLab (Actimetrics, Wilmette, IL). In keeping with previous literature, the size of each phase shift was determined by calculating the delay in activity onset that occurred on the second day in DD after light treatment relative to the timing of lights-on in the previous LD schedule (the activity onset of *Drosophila ananassae* residing in a fixed LD cycle is invariably entrained to the time of lights-on). To help visualize shifts in locomotor rhythms, example actograms are organized in a temporally aligned column, with a dotted line marking the timing of ZT0 in the previous LD schedule. Animals transitioning from LD to DD but receiving no light treatment exhibit phase movements (delays) that average 1.53 h (SEM, 0.13 h, n = 28). Those submitted to flash protocol #48 exhibit 1.92 h delays (SEM, 0.13 h, n = 32) after discounting/subtracting-out the average phase movements accompanying the LD schedule transition. In all cases, individual flies demonstrate a stable periodicity of the activity rhythm from days 2-4 in DD.
